# Supplementary material
Source: PubMed Central journal article supplement (PMC299810)

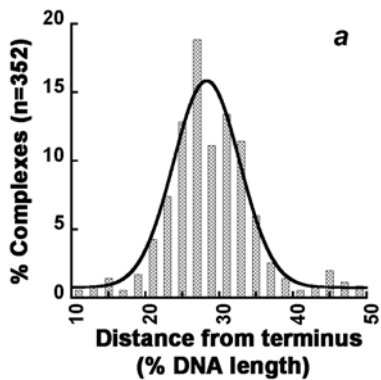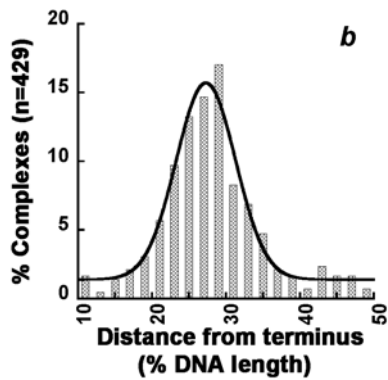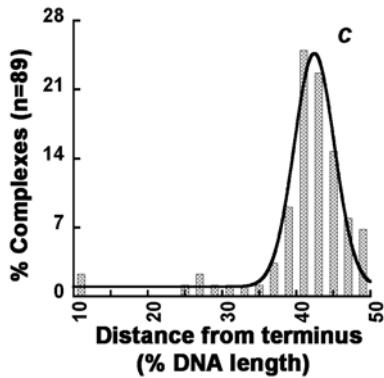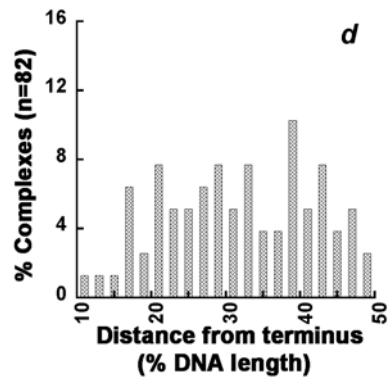

Supplement: pnas_100_25_14822__3.pdf [file pnas_100_25_14822__3.pdf]

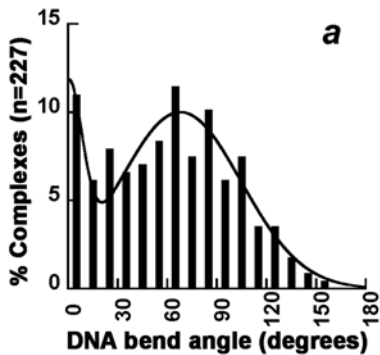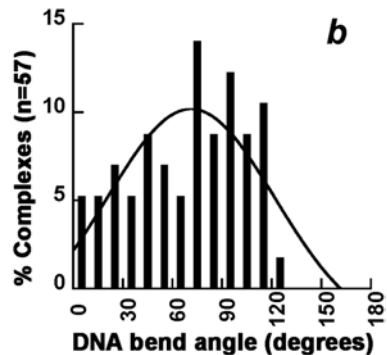

Supplement: pnas_100_25_14822__5.pdf [file pnas_100_25_14822__5.pdf]

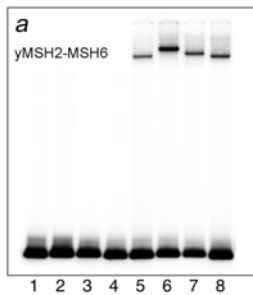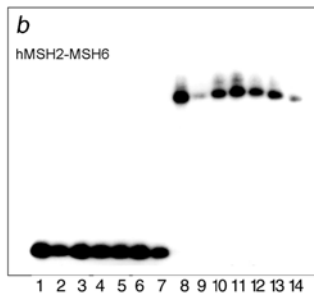

Supplement: pnas_100_25_14822__7.pdf [file pnas_100_25_14822__7.pdf]

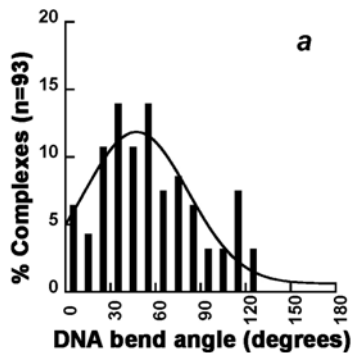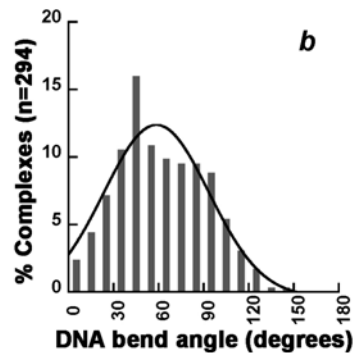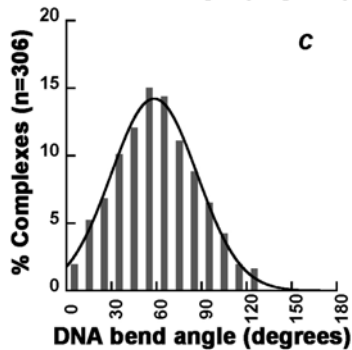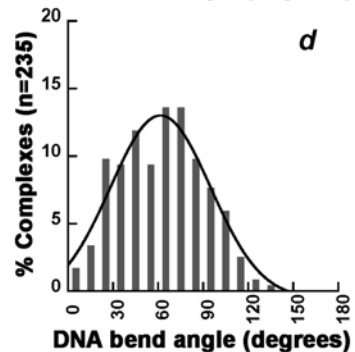

Supplement: pnas_100_25_14822__9.pdf [file pnas_100_25_14822__9.pdf]
